# Supplementary material for: Impact of Interfering Substances on the Bactericidal Efficacy of Different Commercially Available Hypochlorous Acid-Based Wound Irrigation Solutions Commonly Found in South-East Asia
Source: MDPI journal article supplement (doi:10.3390/antibiotics13040309), 2024-03-28
Supplement: s1 [file s1]

## Supplementary data

**Table S1.** Result of dilution-neutralization validation (Control C): Replicate 1

| CFU of validation suspension | Test Condition         | Test Product                                        | CFU of Control C |
|------------------------------|------------------------|-----------------------------------------------------|------------------|
| Nv/10: 141                   | Low protein condition  | octenilin® wound irrigation solution                | 130.0            |
|                              |                        | Prontosan® Wound Irrigation Solution                | 137.5            |
|                              |                        | Antaviro®                                           | 135.0            |
|                              |                        | Dermacyn® wound care solution                       | 132.0            |
|                              |                        | Hydrocyn® Aqua                                      | 140.0            |
|                              |                        | Granudacyn® wound irrigation solution               | 129.5            |
|                              |                        | Electrocyn Soma™ advanced wound irrigation solution | 133.0            |
|                              |                        | 0.85% NaCl                                          | 141.0            |
| Nv/10: 131.0                 | High protein condition | octenilin® wound irrigation solution                | 122.0            |
|                              |                        | Prontosan® Wound Irrigation Solution                | 130.0            |
|                              |                        | Antaviro®                                           | 131.5            |
|                              |                        | Dermacyn® wound care solution                       | 120.5            |
|                              |                        | Hydrocyn® Aqua                                      | 134.0            |
|                              |                        | Granudacyn® wound irrigation solution               | 143.0            |
|                              |                        | Electrocyn Soma™ advanced wound irrigation solution | 146.0            |
|                              |                        | 0.85% NaCl                                          | 124.0            |

**Table S2.** Result of the dilution-neutralization validation (Control C): Replicate 2

| CFU of validation suspension | Test Condition         | Test Product                                        | CFU of Control C |
|------------------------------|------------------------|-----------------------------------------------------|------------------|
| Nv/10: 139.0                 | Low protein condition  | octenilin® wound irrigation solution                | 137.5            |
|                              |                        | Prontosan® Wound Irrigation Solution                | 139.0            |
|                              |                        | Antaviro®                                           | 138.5            |
|                              |                        | Dermacyn® wound care solution                       | 145.5            |
|                              |                        | Hydrocyn® Aqua                                      | 133.5            |
|                              |                        | Granudacyn® wound irrigation solution               | 142.5            |
|                              |                        | Electrocyn Soma™ advanced wound irrigation solution | 137.0            |
|                              |                        | 0.85% NaCl                                          | 132.5            |
| Nv/10: 136.5                 | High protein condition | octenilin® wound irrigation solution                | 127.5            |
|                              |                        | Prontosan® wound Irrigation Solution                | 125.0            |
|                              |                        | Antaviro®                                           | 125.0            |
|                              |                        | Dermacyn® wound care solution                       | 132.0            |
|                              |                        | Hydrocyn® Aqua                                      | 128.5            |
|                              |                        | Granudacyn® wound irrigation solution               | 127.5            |
|                              |                        | Electrocyn Soma™ advanced wound irrigation solution | 130.0            |
|                              |                        | 0.85% NaCl                                          | 130.0            |
